# Supplementary material for: Functional secretome analysis reveals Annexin-A1 as important paracrine factor derived from fetal mesenchymal stem cells in hepatic regeneration
Source: PubMed Central journal article supplement — eBioMedicine. 2019 Jul 12;45:542–52. doi: 10.1016/j.ebiom.2019.07.009 (PMC6642415; doi:10.1016/j.ebiom.2019.07.009), 2019-07-12
Supplement: mmc3.pdf [file mmc3.pdf]

### **Fig. 3a**

#### **Western blot analysis**

| <b>Group</b>             | <b>Mean Value</b> | <b>Standard deviation</b> | <b>Confidence Level</b> |
|--------------------------|-------------------|---------------------------|-------------------------|
| <b>AF-MSCs</b>           | 1                 | 0                         | 95%                     |
| <b>AF-MSC shscramble</b> | 0.9               | 0.1                       | 95%                     |
| <b>AF-MSC shANXA1</b>    | 0.6               | 0.1                       | 95%                     |

AF-MSCs vs AF-MSC shscramble:  $p=0.17$

AF-MSCs vs AF-MSC shANXA1:  $p= 0.0002$

AF-MSC shscramble vs AF-MSC shANXA1:  $p= 0.003$

\* Mean values were expressed after normalization with AF-MSCs, which is the control group.

### **Fig. 3b**

#### **ELISA analysis**

| <b>Group</b>             | <b>Mean Value (ng/ml)</b> | <b>Standard deviation</b> | <b>Confidence Level</b> |
|--------------------------|---------------------------|---------------------------|-------------------------|
| <b>AF-MSC shscramble</b> | 5.6                       | 1.1                       | 95%                     |
| <b>AF-MSC shANXA1</b>    | 1.3                       | 0.5                       | 95%                     |

AF-MSC shscramble vs AF-MSC shANXA1:  $p= 3.8 \times 10^{-5}$

### **Fig. 3c**

#### **Western blot analysis**

| <b>Group</b>             | <b>Mean Value</b> | <b>Standard deviation</b> | <b>Confidence Level</b> |
|--------------------------|-------------------|---------------------------|-------------------------|
| <b>AF-MSC shscramble</b> | 10.8              | 0,91                      | 95%                     |
| <b>AF-MSC shANXA1</b>    | 2.1               | 0.19                      | 95%                     |

AF-MSC shscramble vs AF-MSC shANXA1:  $p= 0.03$

**Fig. 4a**

**Proliferation Rate**

| Day 3             |            |                    |                  |
|-------------------|------------|--------------------|------------------|
| Group             | Mean Value | Standard deviation | Confidence Level |
| AF-MSCs           | 85.4       | 19.3               | 95%              |
| AF-MSC shscramble | 60.5       | 7.9                | 95%              |
| AF-MSC shANXA1    | 22.7       | 9.6                | 95%              |

AF-MSCs vs AF-MSC shscramble:  $p=0.1$

AF-MSCs vs AF-MSC shANXA1:  $p= 0.002$

AF-MSC shscramble vs AF-MSC shANXA1:  $p= 0.002$

| Day 5             |            |                    |                  |
|-------------------|------------|--------------------|------------------|
| Group             | Mean Value | Standard deviation | Confidence Level |
| AF-MSCs           | 156.95     | 9                  | 95%              |
| AF-MSC shscramble | 155.6      | 18.7               | 95%              |
| AF-MSC shANXA1    | 85.5       | 30.9               | 95%              |

AF-MSCs vs AF-MSC shscramble:  $p=0.9$

AF-MSCs vs AF-MSC shANXA1:  $p= 0.012$

AF-MSC shscramble vs AF-MSC shANXA1:  $p= 0.018$

| Day 7             |            |                    |                  |
|-------------------|------------|--------------------|------------------|
| Group             | Mean Value | Standard deviation | Confidence Level |
| AF-MSCs           | 196.9      | 23                 | 95%              |
| AF-MSC shscramble | 194.8      | 40.9               | 95%              |
| AF-MSC shANXA1    | 80.4       | 22.4               | 95%              |

AF-MSCs vs AF-MSC shscramble:  $p=0.94$

AF-MSCs vs AF-MSC shANXA1:  $p= 0.001$

AF-MSC shscramble vs AF-MSC shANXA1:  $p= 0.005$

**Fig. 4c**

**Clonogenic potential**

| Group             | Mean Value (CFU-F/100 cells) | Standard deviation | Confidence Level |
|-------------------|------------------------------|--------------------|------------------|
| AF-MSCs           | 9.2                          | 0.72               | 95%              |
| AF-MSC shscramble | 6.9                          | 2.02               | 95%              |
| AF-MSC shANXA1    | 2.6                          | 0.8                | 95%              |

AF-MSCs vs AF-MSC shscramble:  $p=0.14$

AF-MSCs vs AF-MSC shANXA1:  $p= 0.0004$

AF-MSC shscramble vs AF-MSC shANXA1:  $p= 0.02$

#### **Fig. 4d**

##### **Migratory potential**

| Group             | Mean Value (%) | Standard deviation | Confidence Level |
|-------------------|----------------|--------------------|------------------|
| AF-MSCs           | 100            | 0                  | 95%              |
| AF-MSC shscramble | 87.1           | 16.9               | 95%              |
| AF-MSC shANXA1    | 37.1           | 20                 | 95%              |

AF-MSCs vs AF-MSC shscramble:  $p=0.3$

AF-MSCs vs AF-MSC shANXA1:  $p= 0.0015$

AF-MSC shscramble vs AF-MSC shANXA1:  $p= 0.009$

\* Mean values were expressed after normalization with AF-MSCs, which is the control group.

#### **Fig. 4e**

##### **Differentiation potential**

| Group          | Mean Value | Standard deviation | Confidence Level |
|----------------|------------|--------------------|------------------|
| HPL            | 886.7      | 146.8              | 95%              |
| HPL shscramble | 873.7      | 41.7               | 95%              |
| HPL shANXA1    | 597.2      | 41.5               | 95%              |

HPL vs HPL shscramble:  $p= 0.87$

HPL vs HPL shANXA1=  $p= 0.02$

HPL shscramble vs HPL shANXA1:  $p= 0.0003$

#### **Fig. 5b**

### Serum AST and ALT levels

| AST (SGOT)    |                  |                    |                  |
|---------------|------------------|--------------------|------------------|
| Group         | Mean Value (U/L) | Standard deviation | Confidence Level |
| control       | 196.8            | 25.2               | 95%              |
| AHF           | 923.8            | 710.7              | 95%              |
| shscramble-CM | 263.6            | 139.6              | 95%              |
| shANXA1-CM    | 547.6            | 225.8              | 95%              |

AHF vs shscramble-CM: p=0.013

AHF vs shANXA1-CM: p= 0.027

| ALT (SGPT) (U/L) |                  |                    |                  |
|------------------|------------------|--------------------|------------------|
| Group            | Mean Value (U/L) | Standard deviation | Confidence Level |
| control          | 54.4             | 25.3               | 95%              |
| AHF              | 1025             | 644.4              | 95%              |
| shscramble-CM    | 129.3            | 51.8               | 95%              |
| shANXA1-CM       | 743.5            | 392                | 95%              |

AHF vs shscramble-CM: p= 0.006

AHF vs shANXA1-CM: p= 0.028

### Fig. 5c

### Mouse serum cytokine levels (IFN - $\gamma$ , TNF, IL-10)

| IFN- $\gamma$ |                    |                    |                  |
|---------------|--------------------|--------------------|------------------|
| Group         | Mean Value (pg/ml) | Standard deviation | Confidence Level |
| control       | 40.1               | 16.7               | 95%              |
| AHF           | 106.5              | 8.5                | 95%              |
| shscramble-CM | 67.2               | 11.8               | 95%              |
| shANXA1-CM    | 125.1              | 392                | 95%              |

control vs AHF: p=  $8 \times 10^{-5}$

shscramble-CM vs AHF: p= 0.001

shANXA1-CM vs shscramble-CM: p= 0.5

| TNF           |                    |                    |                  |
|---------------|--------------------|--------------------|------------------|
| Group         | Mean Value (pg/ml) | Standard deviation | Confidence Level |
| control       | 52.9               | 3.6                | 95%              |
| AHF           | 258.9              | 58                 | 95%              |
| shscramble-CM | 153.9              | 27.9               | 95%              |
| shANXA1-CM    | 189.1              | .18.3              | 95%              |

control vs AHF: p= 0.01

shscramble-CM vs AHF: p= 0.03

shANXA1-CM vs shscramble-CM: p= 0.05

| <b>IL-10</b>         |                           |                           |                         |
|----------------------|---------------------------|---------------------------|-------------------------|
| <b>Group</b>         | <b>Mean Value (pg/ml)</b> | <b>Standard deviation</b> | <b>Confidence Level</b> |
| <b>control</b>       | 10.39                     | 3.7                       | 95%                     |
| <b>AHF</b>           | 90.2                      | 10.6                      | 95%                     |
| <b>shscramble-CM</b> | 106.4                     | 8.9                       | 95%                     |
| <b>shANXA1-CM</b>    | 88.4                      | 15.6                      | 95%                     |

control vs AHF: p= 0.001

shscramble-CM vs AHF: p= 0.05

shANXA1-CM vs shscramble-CM: p= 0.05

### **Fig. 6**

#### **Mouse oval cell proliferation**

| <b>Growth Rate of oval cells %</b> |                   |                           |                         |
|------------------------------------|-------------------|---------------------------|-------------------------|
| <b>Group</b>                       | <b>Mean Value</b> | <b>Standard deviation</b> | <b>Confidence Level</b> |
| <b>DMEM (0.5% FBS)</b>             | 11.9              | 5.4                       | 95%                     |
| <b>DMEM (20% FBS)</b>              | 31.9              | 11.5                      | 95%                     |
| <b>CM</b>                          | 25.3              | 16.4                      | 95%                     |
| <b>shscramble-CM</b>               | 13.8              | 3.5                       | 95%                     |
| <b>shANXA1-CM</b>                  | -7.1              | 3.5                       | 95%                     |

CM vs DMEM (20% FBS): p= 0.26

CM vs shscramble-CM: p= 0.08

CM vs shANXA1-CM: p= 0.001

### **Supplementary Fig. 1**

#### **PCR analysis for a-fetoprotein, albumin and tyrosine aminotransferase expression levels**

| <b>a-Fetoprotein</b> |                   |                           |                         |
|----------------------|-------------------|---------------------------|-------------------------|
| <b>Group</b>         | <b>Mean Value</b> | <b>Standard deviation</b> | <b>Confidence Level</b> |

|                  |      |      |     |
|------------------|------|------|-----|
| <b>AF-MSCs</b>   | 1    | 0    | 95% |
| <b>HPL cells</b> | 2.05 | 0.35 | 95% |

| <b>Albumin</b>   |                   |                           |                         |
|------------------|-------------------|---------------------------|-------------------------|
| <b>Group</b>     | <b>Mean Value</b> | <b>Standard deviation</b> | <b>Confidence Level</b> |
| <b>AF-MSCs</b>   | 1                 | 0                         | 95%                     |
| <b>HPL cells</b> | 3.48              | 0.93                      | 95%                     |

| <b>Tyrosine Aminotransferase</b> |                   |                           |                         |
|----------------------------------|-------------------|---------------------------|-------------------------|
| <b>Group</b>                     | <b>Mean Value</b> | <b>Standard deviation</b> | <b>Confidence Level</b> |
| <b>AF-MSCs</b>                   | 1                 | 0                         | 95%                     |
| <b>HPL cells</b>                 | 6.8               | 2.85                      | 95%                     |
